# Supplementary material for: The Cross-Sectional Evaluation of the Use of Artemisinin-Based Combination Therapy for Treatment of Malaria Infection at a Tertiary Hospital in Nigeria
Source: J Trop Med. 2018 May 16;2018:2025858. doi: 10.1155/2018/2025858 (PMC5977018; doi:10.1155/2018/2025858)
Supplement: Supplementary Materials — Additional file (xls) containing antimalarial drug information and drug prescribing indicators data. [file 2025858.f1.xls]

## Sheet: Sheet1
Serial No	Age(years)	Gender	Month of Prescription	Antimalarials Prescribed	Number of Drugs Prescribed	Number of Drugs Dispensed	Number of Drugs Prescribed by Generic name	Number of Drugs Prescribed from NHIS EML	Ecounter with an antibiotic	Ecounter with an Injection
1	54	F	1	Artesunate/Mefloquine	5	5	2	2	0	0
2	50	F	1	Artemether/Lumefantrine	3	3	1	1	0	0
3	10	F	1	Artemether/Lumefantrine	3	3	1	2	0	0
4	30	F	1	Artemether/Lumefantrine	3	2	1	2	1	0
5	Not indicated	F	1	Artemether/Lumefantrine+Sulphadoxine-Pyrimethamine	3	3	1	1	0	0
6	34	F	1	Artemether/Lumefantrine	3	3	0	1	1	0
7	50	M	1	Artemether/Lumefantrine	4	4	1	1	1	0
8	13	F	1	Artemether/Lumefantrine	3	3	1	2	0	0
9	28	F	1	Artemether/Lumefantrine	6	6	1	2	1	0
10	14	M	1	Artemether/Lumefantrine	4	4	2	3	1	0
11	52	M	1	Artemether/Lumefantrine	5	5	4	4	0	0
12	57	F	1	Artemether/Lumefantrine	6	6	2	3	1	0
13	Not indicated	F	1	Artemether/Lumefantrine	8	8	2	4	0	0
14	3	M	1	Artemether/Lumefantrine	3	2	2	2	1	0
15	40	F	1	Artemether/Lumefantrine	5	4	1	4	1	0
16	55	M	1	Artemether/Lumefantrine	5	5	1	4	0	0
17	49	F	1	Artemether/Lumefantrine	7	6	2	2	1	0
18	43	M	1	Artesunate/Sulphadoxine-Pyrimethamine	2	2	0	1	0	0
19	54	F	1	Artemether/Lumefantrine	1	1	0	0	0	0
20	1.25	F	1	Artemether/Lumefantrine	4	4	2	3	1	0
21	45	F	1	Artemether/Lumefantrine	3	3	1	1	0	0
22	Not indicated	F	1	Artemether/Lumefantrine	6	6	3	5	1	0
23	37	F	1	Artemether/Lumefantrine	3	3	1	1	1	0
24	25	F	1	Artemether/Lumefantrine	6	6	2	3	1	0
25	0.67	M	1	Artemether/Lumefantrine	4	3	3	3	0	0
26	Not indicated	F	1	Artesunate/Mefloquine	1	1	0	0	0	0
27	43	F	1	Artemether/Lumefantrine	5	5	1	3	1	0
28	44	M	2	Artesunate/Mefloquine	3	3	1	1	0	0
29	43	F	2	Artemether/Lumefantrine	4	4	1	2	1	0
30	Not indicated	M	2	Artemether/Lumefantrine	1	1	0	0	0	0
31	Not indicated	M	2	Artemether/Lumefantrine	9	9	3	4	0	0
32	9	F	2	Artemether/Lumefantrine	3	3	1	2	1	0
33	Not indicated	F	2	Artemether/Lumefantrine	8	5	2	4	1	0
34	19	F	2	Artemether/Lumefantrine	4	3	1	3	1	0
35	50	F	2	Artemether/Lumefantrine	3	3	1	2	0	0
36	10	F	2	Artemether/Lumefantrine	3	3	2	2	0	0
37	50	F	2	Artemether/Lumefantrine	2	2	0	1	0	0
38	48	F	2	Artesunate/Sulphadoxine-Pyrimethamine	5	5	2	4	0	0
39	45	F	2	Artemether/Lumefantrine	5	4	0	0	1	0
40	Not indicated	F	2	Artesunate/Mefloquine	5	4	0	2	0	0
41	42	F	2	Artemether/Lumefantrine	8	8	3	7	0	0
42	36	F	2	Artemether/Lumefantrine	4	4	1	1	0	0
43	31	F	2	Dihydroartemisinin/Piperaquine	4	4	3	3	0	0
44	Not indicated	F	2	Artemether/Lumefantrine	5	3	1	2	0	0
45	59	M	2	Artesunate	5	4	5	3	1	0
46	64	M	2	Artemether/Lumefantrine	5	5	3	4	0	0
47	50	M	2	Artemether/Lumefantrine	7	7	2	4	0	0
48	43	F	2	Artesunate/Mefloquine	3	3	1	2	0	0
49	16	F	2	Proguanil	6	6	6	6	0	0
50	Not indicated	F	2	Artesunate/SulPhadoxine-Pyrimethamine+Proguanil	6	5	4	5	1	0
51	34	M	2	Dihydroartemisinin/Piperaquine	4	4	2	3	1	0
52	Not indicated	F	3	Dihydroartemisinin/Piperaquine	5	5	1	3	1	0
53	Not indicated	F	3	Dihydroartemisinin/Piperaquine	3	2	1	2	0	0
54	44	F	3	Artemether/Lumefantrine	4	4	2	2	1	0
55	36	F	3	Artemether/Lumefantrine	6	6	3	4	0	0
56	57	M	3	Artesunate/Mefloquine	4	3	1	1	1	0
57	45	F	3	Artemether/Lumefantrine	2	2	0	1	0	0
58	31	F	3	Artemether/Lumefantrine	3	3	3	2	0	0
59	50	F	3	Artemether/Lumefantrine	5	5	4	3	1	0
60	44	F	3	Artemether/Lumefantrine	5	5	1	3	0	0
61	1	F	3	Proguanil	5	5	5	5	0	0
62	Not indicated	M	3	Dihydroartemisinin/Piperaquine	3	3	1	1	0	0
63	54	M	3	Artemether/Lumefantrine	7	4	3	3	0	0
64	42	F	3	Artemether/Lumefantrine	4	4	1	1	0	0
65	37	F	3	Artemether/Lumefantrine	3	3	2	2	0	0
66	8	F	3	Proguanil	5	5	4	5	0	0
67	46	F	3	Artemether/Lumefantrine	5	5	5	4	0	0
68	57	F	3	Artemether/Lumefantrine	6	4	4	3	1	0
69	55	F	3	Artemether/Lumefantrine	11	9	6	7	0	0
70	Not indicated	F	3	Artemether/Lumefantrine	6	5	2	2	0	0
71	54	F	3	Artemether/Lumefantrine	5	5	2	4	0	0
72	50	F	3	Artemether/Lumefantrine	7	5	4	6	1	0
73	Not indicated	F	3	Artemether/Lumefantrine	5	4	1	3	0	0
74	32	F	3	Artemether/Lumefantrine	5	5	2	3	1	0
75	45	F	3	Artemether/Lumefantrine	2	2	2	1	0	0
76	Not indicated	M	3	Artemether/Lumefantrine	6	6	4	5	1	0
77	39	F	3	Artemether/Lumefantrine	8	8	5	6	0	1
78	Not indicated	M	3	Artesunate/Mefloquine	4	3	3	3	0	0
79	44	F	3	Artemether/Lumefantrine	5	5	3	5	0	0
80	40	M	3	Artemether/Lumefantrine	4	3	4	2	0	0
81	Not indicated	F	4	Artemether/Lumefantrine	5	5	3	3	1	0
82	Not indicated	M	4	Artesunate/Mefloquine	4	2	2	3	0	0
83	46	M	4	Artemether/Lumefantrine	2	2	1	1	0	0
84	50	F	4	Dihydroartemisinin/Piperaquine	4	3	1	2	0	0
85	49	F	4	Artemether/Lumefantrine	5	5	4	4	0	0
86	29	F	4	Artemether/Lumefantrine	7	7	5	4	0	0
87	39	F	4	Artemether/Lumefantrine	4	4	2	3	1	0
88	Not indicated	F	4	Artemether/Lumefantrine	3	3	1	2	0	0
89	34	M	4	Artemether/Lumefantrine	5	5	2	4	0	0
90	48	F	4	Artemether/Lumefantrine	6	6	3	3	1	0
91	Not indicated	F	4	Artemether/Lumefantrine	2	2	1	1	0	0
92	Not indicated	M	4	Artemether/Lumefantrine	5	5	3	4	0	0
93	8	F	4	Artemether/Lumefantrine	3	2	1	2	0	0
94	Not indicated	M	4	Dihydroartemisinin/Piperaquine	6	6	4	3	1	0
95	42	F	4	Artesunate/Mefloquine	7	6	6	6	1	0
96	49	F	4	Artemether/Lumefantrine	6	6	4	3	0	0
97	48	F	4	Artemether/Lumefantrine	5	5	3	4	0	0
98	Not indicated	F	4	Artemether/Lumefantrine	4	4	2	3	1	0
99	Not indicated	F	4	Artemether/Lumefantrine	5	5	4	4	1	0
100	Not indicated	M	4	Artemether/Lumefantrine	5	5	2	3	1	0
101	Not indicated	F	4	Artemether/Lumefantrine	4	4	1	3	1	0
102	45	M	4	Artemether/Lumefantrine	6	5	5	4	1	0
103	34	M	4	Artemether/Lumefantrine	3	2	1	2	1	0
104	Not indicated	M	4	Artemether/Lumefantrine	3	3	1	2	0	0
105	8	M	4	Proguanil	6	6	5	6	1	0
106	54	M	4	Artemether/Lumefantrine	3	2	0	1	0	0
107	51	F	4	Artemether/Lumefantrine	4	4	2	3	0	0
108	Not indicated	F	4	Artemether/Lumefantrine	8	8	2	5	1	0
109	37	M	4	Artemether/Lumefantrine	2	2	0	0	0	0
110	49	M	4	Artemether/Lumefantrine	6	6	2	4	0	1
111	Not indicated	F	4	Dihydroartemisinin/Piperaquine	7	7	2	5	1	0
112	Not indicated	F	4	Artemether/Lumefantrine	5	5	1	3	1	0
113	Not indicated	M	4	Artemether/Lumefantrine	4	4	2	3	1	0
114	Not indicated	F	4	Dihydroartemisinin/Piperaquine	3	3	1	1	0	0
115	40	F	5	Artemether/Lumefantrine	6	6	3	3	0	0
116	38	F	5	Artemether/Lumefantrine	4	4	4	3	0	0
117	Not indicated	F	5	Artesunate/Mefloquine	5	5	4	4	0	0
118	2	M	5	Artesunate/Mefloquine	4	4	2	3	0	0
119	12	F	5	Artesunate/Mefloquine	3	3	2	2	0	0
120	15	M	5	Artemether/Lumefantrine	3	2	1	2	0	0
121	4	F	5	Artemether/Lumefantrine	3	2	1	2	0	0
122	67	M	5	Artemether/Lumefantrine	5	5	1	4	0	0
123	Not indicated	F	5	Artemether/Lumefantrine	4	4	3	3	0	0
124	38	F	5	Artemether/Lumefantrine	4	4	2	3	1	0
125	25	M	5	Artemether/Lumefantrine	4	4	2	2	0	0
126	Not indicated	F	5	Artemether/Lumefantrine	4	4	2	2	0	0
127	Not indicated	F	5	Artemether/Lumefantrine	5	5	2	3	1	0
128	7	F	5	Artemether/Lumefantrine	7	6	6	6	1	0
129	Not indicated	F	5	Artemether/Lumefantrine	7	7	4	4	1	0
130	Not indicated	F	5	Artemether/Lumefantrine	3	2	0	3	0	0
131	Not indicated	F	5	Artemether/Lumefantrine	4	3	1	3	1	0
132	33	F	5	Proguanil	2	2	2	2	0	0
133	Not indicated	F	5	Artemether/Lumefantrine	5	4	0	3	1	0
134	13	F	5	Artemether/Lumefantrine	6	6	4	5	1	0
135	49	F	5	Artemether/Lumefantrine	2	2	0	0	0	0
136	50	F	5	Artemether/Lumefantrine	3	3	0	1	0	0
137	43	F	5	Artemether/Lumefantrine	2	2	1	1	0	0
138	54	M	5	Artemether/Lumefantrine	4	4	0	2	1	0
139	Not indicated	F	5	Artemether/Lumefantrine	8	6	4	7	0	0
140	17	M	5	Artemether/Lumefantrine	1	1	0	0	0	0
141	48	F	5	Artemether/Lumefantrine	4	3	1	3	0	0
142	32	M	5	Artemether/Lumefantrine	5	5	4	2	1	0
143	1	M	5	Artesunate/Amodiaquine	5	5	3	4	1	0
144	52	F	5	Artemether/Lumefantrine	6	5	3	4	1	0
145	54	M	5	Artemether/Lumefantrine	5	4	0	0	0	0
146	54	F	5	Artemether/Lumefantrine	6	6	5	4	0	0
147	49	F	5	Artemether/Lumefantrine	4	4	3	3	1	0
148	Not indicated	F	5	Artemether/Lumefantrine	4	3	0	3	1	0
149	42	F	5	Artemether/Lumefantrine	4	3	2	3	0	0
150	48	F	5	Artemether/Lumefantrine	5	5	2	4	0	0
151	Not indicated	F	5	Artemether/Lumefantrine	8	8	4	6	0	0
152	Not indicated	F	5	Artemether/Lumefantrine	4	4	3	3	0	0
153	Not indicated	F	5	Artemether/Lumefantrine	6	6	2	4	0	0
154	Not indicated	F	5	Artemether/Lumefantrine	5	4	0	3	1	0
155	41	M	5	Artemether/Lumefantrine	5	5	4	4	0	0
156	40	F	5	Artemether/Lumefantrine	5	5	3	3	1	0
157	34	F	5	Artemether/Lumefantrine	5	5	3	4	1	0
158	9	M	6	Artemether/Lumefantrine	5	3	4	3	1	0
159	40	F	6	Artemether/Lumefantrine	5	5	3	3	0	0
160	50	M	6	Artemether/Lumefantrine	4	4	2	0	0	0
161	45	F	6	Artemether/Lumefantrine	6	6	2	2	0	0
162	43	F	6	Artemether/Lumefantrine	3	3	2	2	0	0
163	2	M	6	Artemether/Lumefantrine	4	4	2	3	0	0
164	Not indicated	F	6	Sulphadoxine-Pyrimethamine	5	5	4	5	1	0
165	Not indicated	F	6	Artemether/Lumefantrine	5	5	4	4	1	0
166	34	F	6	Artemether/Lumefantrine	5	5	2	3	0	0
167	Not indicated	F	6	Artemether/Lumefantrine	5	5	2	2	0	0
168	39	M	6	Artemether/Lumefantrine	2	2	1	1	0	0
169	Not indicated	F	6	Artemether/Lumefantrine	5	5	4	4	0	0
170	Not indicated	F	6	Artemether/Lumefantrine	6	6	4	3	0	0
171	Not indicated	F	6	Arteether	5	3	3	3	1	1
172	43	F	6	Artemether/Lumefantrine	4	4	2	3	0	0
173	27	F	6	Artemether/Lumefantrine	4	4	2	2	0	0
174	2	F	6	Artemether/Lumefantrine	8	7	3	6	1	0
175	44	F	6	Artemether/Lumefantrine	2	2	1	1	0	0
176	10	F	6	Artemether/Lumefantrine	3	2	0	1	0	0
177	Not indicated	F	6	Artemether/Lumefantrine	6	6	4	4	0	0
178	1	F	6	Artemether/Lumefantrine	6	6	3	5	0	0
179	11	F	6	Artemether/Lumefantrine	2	2	1	1	0	0
180	57	M	6	Artesunate/Mefloquine	5	4	1	2	1	0
181	32	M	6	Artemether	5	4	3	4	0	1
182	Not indicated	M	6	Artemether/Lumefantrine	5	5	2	3	0	0
183	51	M	6	Artemether/Lumefantrine	4	3	2	2	0	0
184	Not indicated	M	6	Artemether/Lumefantrine	6	6	4	5	1	0
185	44	F	6	Artemether/Lumefantrine	3	3	3	3	0	0
186	2	M	6	Artesunate/Amodiaquine	6	5	3	3	1	0
187	58	F	6	Artemether/Lumefantrine	10	7	3	5	0	0
188	61	M	6	Artesunate/Mefloquine	2	2	0	1	0	0
189	58	M	6	Artemether/Lumefantrine	5	5	1	2	0	0
190	39	M	6	Artemether/Lumefantrine	5	5	4	4	0	0
191	49	F	6	Artemether/Lumefantrine	5	4	5	4	1	0
192	Not indicated	F	6	Artemether/Lumefantrine	4	3	4	3	0	0
193	Not indicated	M	6	Artemether/Lumefantrine	4	4	2	3	0	0
194	37	F	6	Artemether/Lumefantrine	5	5	2	3	0	0
195	50	F	6	Artemether/Lumefantrine	7	7	2	5	0	0
196	10	M	6	Artemether/Lumefantrine	2	2	1	1	0	0
197	32	F	6	Artemether/Lumefantrine	3	3	2	2	0	0
198	47	F	6	Artemether/Lumefantrine	3	3	1	2	1	0
199	75	M	6	Sulphadoxine-Pyrimethamine	5	5	3	5	0	0
200	2	F	6	Artemether/Lumefantrine	5	5	3	4	1	0
201	9	F	6	Artemether/Lumefantrine	3	3	2	1	1	0
202	52	F	6	Artemether/Lumefantrine	9	8	3	5	1	0
203	Not indicated	M	6	Artemether/Lumefantrine	6	6	4	3	0	0
204	45	F	6	Artemether/Lumefantrine	7	7	5	5	0	0
205	60	M	6	Artemether/Lumefantrine	6	5	2	3	0	0
206	Not indicated	F	7	Artemether/Lumefantrine	5	5	0	2	1	0
207	Not indicated	M	7	Artemether/Lumefantrine	3	3	2	2	1	0
208	29	F	7	Artemether/Lumefantrine	4	4	2	2	0	0
209	35	M	7	Artemether/Lumefantrine	3	3	2	2	0	0
210	61	F	7	Artemether/Lumefantrine	9	8	6	6	0	0
211	Not indicated	F	7	Artemether/Lumefantrine	3	3	3	2	0	0
212	Not indicated	F	7	Artemether/Lumefantrine	8	8	4	7	1	0
213	55	M	7	Artemether/Lumefantrine	5	5	2	4	1	0
214	49	F	7	Artesunate/Mefloquine	4	3	2	3	0	0
215	Not indicated	F	7	Artemether/Lumefantrine	4	4	2	2	1	0
216	50	F	7	Artemether/Lumefantrine	8	8	1	4	1	0
217	37	F	7	Artemether/Lumefantrine	5	5	3	2	0	0
218	0.2	F	7	Artemether/Lumefantrine	5	3	3	3	1	0
219	Not indicated	M	7	Amodiaqunine	2	1	0	0	0	0
220	43	F	7	Artemether/Lumefantrine	5	5	3	4	0	0
221	Not indicated	F	7	Artemether/Lumefantrine	6	5	3	5	1	0
222	9	M	7	Artemether/Lumefantrine	4	4	3	3	0	0
223	0.83	M	7	Artemether/Lumefantrine	3	3	2	2	0	0
224	3	F	7	Dihydroartemisinin	2	2	0	1	0	0
225	13	F	7	Artesunate/Sulphadoxine-Pyrimethamine	3	2	1	3	0	0
226	6	M	7	Artesunate/Amodiaquine	4	2	4	2	0	0
227	27	F	7	Artemether/Lumefantrine	4	4	2	3	0	0
228	60	F	7	Artemether/Lumefantrine	6	6	2	3	0	0
229	55	M	7	Artemether/Lumefantrine	6	6	3	5	1	0
230	40	F	7	Artemether/Lumefantrine	5	5	4	3	0	0
231	54	F	7	Artemether/Lumefantrine	4	4	2	2	0	0
232	48	M	7	Artemether/Lumefantrine	3	3	2	2	0	0
233	7	M	7	Artemether/Lumefantrine	5	5	4	4	0	0
234	9	M	7	Artemether/Lumefantrine	4	3	3	3	0	0
235	31	F	7	Artemether/Lumefantrine	6	6	4	3	0	0
236	59	M	7	Artesunate/Mefloquine	5	5	2	5	1	0
237	46	F	7	Artemether/Lumefantrine	6	6	4	5	1	0
238	30	F	7	Artemether/Lumefantrine	5	4	2	3	1	0
239	Not indicated	F	7	Artemether/Lumefantrine	5	5	3	2	0	0
240	43	F	7	Artemether/Lumefantrine	4	4	2	3	1	0
241	43	F	7	Artemether/Lumefantrine	7	7	2	6	0	0
242	36	F	7	Artemether/Lumefantrine	5	5	3	4	0	0
243	Not indicated	M	7	Artesunate/Amodiaquine	5	4	2	4	1	0
244	10	F	7	Artemether/Lumefantrine	3	3	1	3	0	0
245	54	M	7	Artemether/Lumefantrine	3	3	1	2	0	0
246	48	M	7	Artemether/Lumefantrine	7	5	0	2	0	0
247	34	F	7	Artemether/Lumefantrine	4	4	2	3	0	0
248	2.5	M	7	Artemether/Lumefantrine	3	3	1	2	1	0
249	43	F	7	Dihydroartemisinin/Piperaquine	5	4	2	4	0	0
250	49	F	7	Artesunate/Mefloquine	4	4	2	3	0	0
251	1.92	M	7	Artemether/Lumefantrine	4	4	3	3	1	0
252	28	M	7	Artemether/Lumefantrine	2	1	1	1	0	0
253	53	M	7	Artemether/Lumefantrine	2	2	1	1	1	0
254	47	F	7	Artesunate/Amodiaquine	7	5	4	6	1	0
255	43	M	7	Artemether/Lumefantrine	6	6	3	5	0	0
256	32	F	7	Arteether	1	1	0	0	0	1
257	Not indicated	F	7	Artemether/Lumefantrine	7	7	4	4	1	0
258	Not indicated	F	7	Artemether/Lumefantrine	4	4	2	1	0	0
259	57	M	7	Artemether/Lumefantrine	9	8	5	4	0	0
260	47	F	7	Artesunate/Sulphadoxine-Pyrimethamine	8	6	5	7	1	0
261	Not indicated	F	7	Artemether/Lumefantrine	7	7	3	5	1	0
262	36	F	7	Artemether/Lumefantrine	3	3	1	1	0	0
263	Not indicated	M	7	Dihydroartemisinin/Piperaquine	4	4	2	2	0	0
264	4	M	7	Artemether/Lumefantrine	3	2	2	3	1	0
265	Not indicated	F	7	Artemether/Lumefantrine	6	6	4	4	0	0
266	Not indicated	F	7	Artemether/Lumefantrine	7	5	4	3	0	0
267	43	F	7	Artemether/Lumefantrine	5	5	3	2	0	0
268	Not indicated	F	7	Artemether/Lumefantrine	6	6	4	3	0	0
269	43	F	7	Artemether/Lumefantrine	4	4	2	3	0	0
270	32	F	7	Artemether/Lumefantrine	4	4	1	2	1	0
271	Not indicated	M	8	Artemether/Lumefantrine	9	9	3	4	0	0
272	48	F	8	Artemether/Lumefantrine	4	4	1	0	0	0
273	Not indicated	F	8	Artemether/Lumefantrine	7	7	0	2	1	0
274	51	M	8	Artemether/Lumefantrine	7	5	3	5	1	0
275	30	F	8	Dihydroartemisinin/Piperaquine	4	4	3	4	0	0
276	Not indicated	F	8	Artemether/Lumefantrine	6	6	2	4	0	0
277	Not indicated	F	8	Artemether/Lumefantrine	6	6	5	5	1	0
278	Not indicated	F	8	Artemether/Lumefantrine	7	7	2	4	0	0
279	29	F	8	Artemether/Lumefantrine	4	4	2	3	0	0
280	50	F	8	Dihydroartemisinin/Piperaquine	5	5	3	3	1	0
281	40	F	8	Artemether/Lumefantrine	6	6	4	3	0	0
282	10	M	8	Artemether/Lumefantrine	3	3	2	2	0	0
283	56	M	8	Artemether/Lumefantrine	3	3	0	2	0	0
284	2	F	8	Artemether/Lumefantrine	6	6	4	4	1	0
285	Not indicated	M	8	Artemether/Lumefantrine	7	5	6	5	0	0
286	40	F	8	Artemether/Lumefantrine	3	3	2	2	0	0
287	33	M	8	Artesunate/Mefloquine	4	4	2	2	0	0
288	11	F	8	Artemether/Lumefantrine	1	1	0	0	0	0
289	39	F	9	Artemether/Lumefantrine	6	6	4	4	1	0
290	Not indicated	M	9	Dihydroartemisinin/Piperaquine	5	4	3	4	1	0
291	10	F	9	Artemether/Lumefantrine	5	5	4	4	0	0
292	49	F	9	Artemether/Lumefantrine	4	4	2	2	1	0
293	44	F	9	Artesunate/Amodiaquine	8	7	4	6	1	0
294	11	F	9	Artemether/Lumefantrine	2	2	1	0	0	0
295	34	M	9	Artemether/Lumefantrine	5	4	2	3	1	0
296	Not indicated	F	9	Artesunate	2	2	2	1	1	0
297	Not indicated	F	9	Artesunate/Mefloquine	4	4	2	3	0	0
298	42	F	9	Artemether/Lumefantrine	6	4	3	3	0	0
299	Not indicated	M	9	Artesunate/Mefloquine	6	6	4	5	0	0
300	Not indicated	M	9	Artemether/Lumefantrine	2	2	1	1	0	0
301	Not indicated	M	9	Artemether/Lumefantrine	4	3	3	3	1	0
302	52	F	9	Dihydroartemisinin/Piperaquine	6	5	3	3	1	0
303	55	F	9	Artemether/Lumefantrine	8	5	2	5	1	0
304	Not indicated	F	9	Artemether/Lumefantrine	8	8	6	5	0	0
305	10	F	9	Artemether/Lumefantrine	2	2	1	1	0	0
306	47	F	9	Artemether/Lumefantrine	4	4	1	2	0	0
307	44	F	9	Artemether/Lumefantrine	6	6	4	4	0	0
308	2	F	9	Artemether/Lumefantrine	11	8	7	8	1	0
309	Not indicated	M	9	Artemether/Lumefantrine	4	4	1	2	0	0
310	52	F	9	Artemether/Lumefantrine	9	7	6	5	0	0
311	50	F	9	Artemether/Lumefantrine	8	7	2	5	0	0
312	Not indicated	F	9	Artemether/Lumefantrine	5	5	1	2	1	0
313	Not indicated	M	9	Artemether/Lumefantrine	6	5	5	2	1	0
314	Not indicated	F	9	Artemether/Lumefantrine	5	4	2	3	1	0
315	11	F	9	Artemether/Lumefantrine	4	3	2	2	0	0
316	6	F	9	Artemether/Lumefantrine	3	2	1	1	0	0
317	Not indicated	M	9	Artemether/Lumefantrine	4	3	3	3	0	0
318	0	F	9	Artemether/Lumefantrine	7	6	3	2	1	0
319	Not indicated	M	9	Dihydroartemisinin/Piperaquine	5	4	4	4	1	0
320	55	F	9	Artemether/Lumefantrine	7	7	2	2	0	0
321	15	M	9	Artemether/Lumefantrine	3	3	2	2	0	0
322	Not indicated	F	9	Artemether/Lumefantrine	8	5	3	5	0	0
323	Not indicated	F	9	Artemether/Lumefantrine	7	6	4	5	1	0
324	4	F	10	Artemether/Lumefantrine	4	3	1	3	1	0
325	Not indicated	F	10	Artemether/Lumefantrine	4	3	3	3	0	0
325	48	F	10	Artemether/Lumefantrine	4	4	2	3	0	0
327	13	F	10	Artesunate/Amodiaquine	4	4	4	3	1	0
328	13	F	10	Artemether/Lumefantrine	5	4	3	3	0	0
329	43	F	10	Artemether/Lumefantrine	5	4	3	3	0	0
330	33	F	10	Artemether/Lumefantrine	3	3	1	2	1	0
331	59	M	11	Artemether/Lumefantrine	8	8	4	7	1	0
332	52	F	11	Artemether/Lumefantrine	7	5	1	5	1	0
333	47	F	12	Artemether/Lumefantrine	5	5	3	4	0	0
